# Supplementary material
Source: Springer Nature journal article supplement (https://www.springermedizin.de/resource/supplementary/13256_2009_1094_MOESM4_ESM.pdf/9646992)

12.43.33.61  
3 IMA 81  
SPI 3  
SP -48.5

H-SP-CF

R

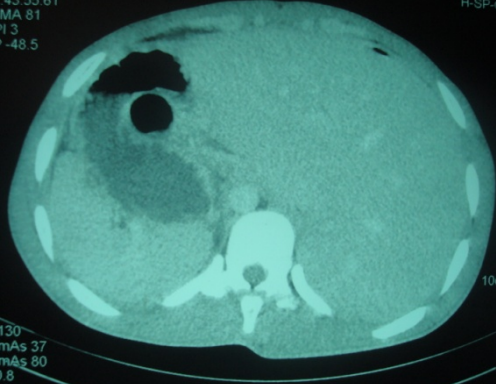

10cm

kV 130  
eff.mAs 37  
ref.mAs 80  
TI 0.8  
GT 0.0  
SI 3.00 5.10 0.0

Supplement: MOESM4 [file 9646992]
